# Supplementary material for: The Design of PAN-Based Janus Membrane with Adjustable Asymmetric Wettability in Wastewater Purification
Source: MDPI journal article supplement (doi:10.3390/ma17020417), 2024-01-14
Supplement: s1 [file s1]

# Supporting Information

## The Design of PAN-Based Janus Membrane with Adjustable Asymmetric Wettability in Wastewater Purification

Yuehui Wang <sup>1,†</sup>, Jun Huang <sup>1,†</sup>, Ye Zhang <sup>1</sup>, Shiwen Zhang <sup>1</sup>, Lili Li <sup>1,\*</sup> and Xuan Pang <sup>2,\*</sup>

<sup>1</sup> Key Laboratory of Automobile Materials, Ministry of Education, College of Materials Science and Engineering, Jilin University, Changchun 130022, China; 15161110960@163.com (Y.W.); 17843334500@163.com (J.H.); 15124698738@163.com (Y.Z.); shiwenuknow@163.com (S.Z.)

<sup>2</sup> Key Laboratory of Polymer Ecomaterials, Changchun Institute of Applied Chemistry, Chinese Academy of Sciences, Changchun 130022, China

\* Correspondence: lilylee@jlu.edu.cn (L.L.); xpang@ciac.ac.cn (X.P.)

† These authors contributed equally to this work.

## **1. Preparation of PAN–PCL Janus membrane**

1 g PAN was dissolved in 10 mL DMF by magnetic stirring for 12 h at room temperature, and then PAN precursor solution was obtained. At the same time, 2 g PCL was added into 10 mL CF/DMF (4:1, v/v) mixed solvent to obtain 20 wt% PCL precursor solution. Both precursor solutions were placed into 5 mL syringes. The PAN substrate layer was fabricated at 16 kV applied voltage and 1 mL h<sup>-1</sup> feeding speed for 2 h. Then the PCL fiber membranes with different thickness were electrospun on PAN substrate layer with an applied voltage of 12 kV and a flow rate of 2 mL h<sup>-1</sup> for different electrospinning time (10 min, 20 min and 30 min, respectively). The prepared Janus membranes were named PAN–PCL<sub>x</sub>, where x represented the electrospinning time of PCL.

## **2. BET analysis**

As presented in Figure S1a, pure PAN exhibited type III adsorption-desorption isotherm with the H<sub>1</sub> hysteresis loop, implying the existence of mesoporous structure [1]. PAN/TiO<sub>2</sub> and PAN/TiO<sub>2</sub>–PCL<sub>x</sub> all possessed typical type II isotherms with sharp H<sub>3</sub> hysteresis loop and the adsorption capacities were all higher than pure PAN (Figure S1a–d) [2]. Meanwhile, the adsorption capacities of PAN/TiO<sub>2</sub>–PCL<sub>x</sub> increased with the introduction of PCL, and the PAN/TiO<sub>2</sub>–PCL<sub>20</sub> exhibited the maximum adsorption capacity.

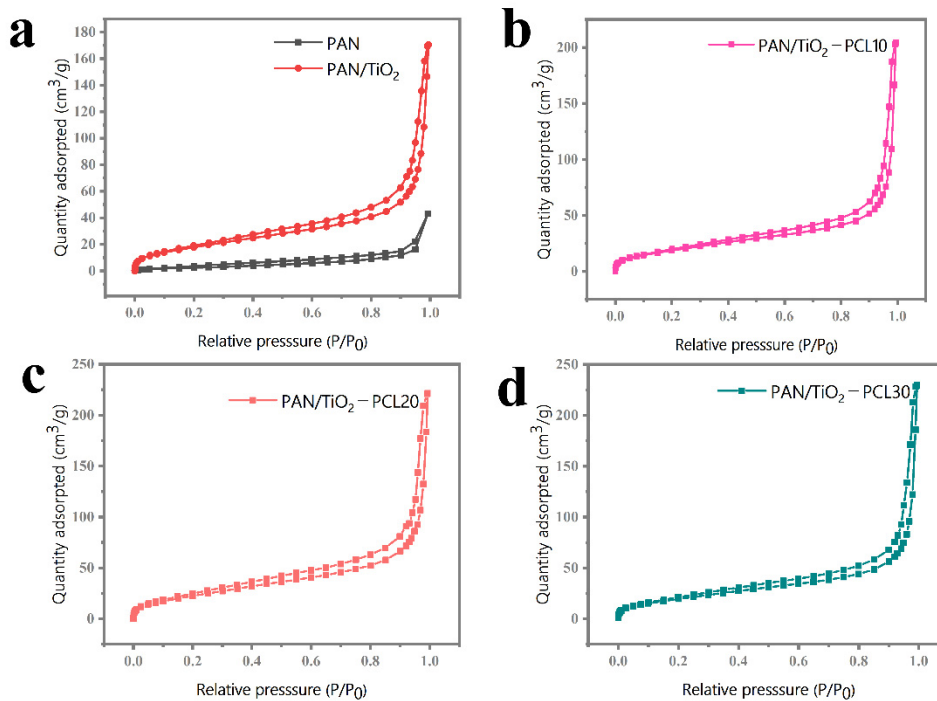

**Figure S1.** Nitrogen ( $N_2$ ) adsorption-desorption isotherms of (a) PAN, PAN/ $TiO_2$ , (b) PAN/ $TiO_2$ -PCL10, (c) PAN/ $TiO_2$ -PCL20 and (d) PAN/ $TiO_2$ -PCL30.

### 3. Surface wettability

Figure S2 was the dynamic wettability of a water droplet on different membranes. When the water droplet was in contact with the surface of PAN, the WCA was  $94.2^\circ$ . It took only 1.2 s to completely wet the surface of the PAN. While the water droplet immediately wetted the PAN/ $TiO_2$ , and the WCA of PAN/ $TiO_2$  was  $0^\circ$ . The WCAs and wetting time of all PAN/ $TiO_2$ -PCL samples increased with the addition of PCL layer. The PAN/ $TiO_2$ -PCL30 possessed the highest WCA with  $132.3^\circ$  and the complete wetting time increased to 118 s. The result indicated that the introduction of  $TiO_2$  and PCL could increase asymmetric wettability.

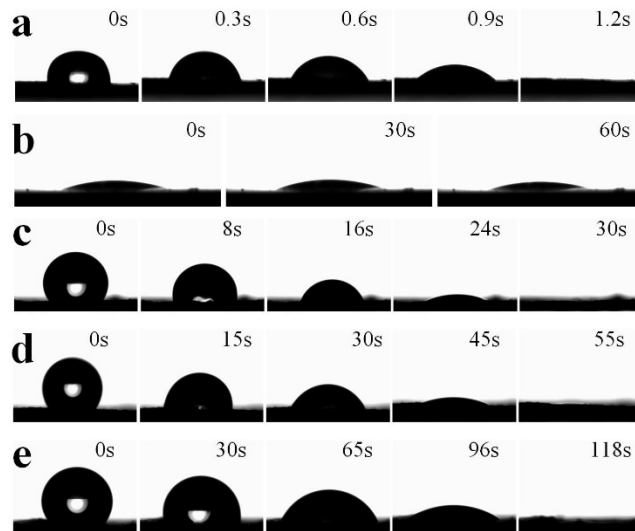

**Figure S2.** Dynamic optical images of the wettability of a water droplet on (a) PAN, (b) PAN/TiO<sub>2</sub>, (c) PAN/TiO<sub>2</sub>-PCL10, (d) PAN/TiO<sub>2</sub>-PCL20 and (e) PAN/TiO<sub>2</sub>-PCL30.

#### 4. Mechanical properties

Figure S3 showed the stress-strain curve of PCL. The tensile strength and strain of PCL were 4.98 MPa and 99.23%, respectively.

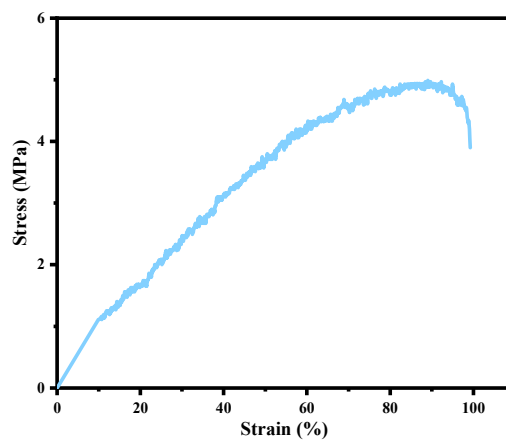

**Figure S3.** Stress-strain curve of PCL.

#### References

1. Kılıç, D.; Sevim, M.; Eroğlu, Z.; Metin, Ö.; Karaca, S., Strontium oxide modified mesoporous graphitic carbon nitride/titanium dioxide nanocomposites (SrO-mpg-CN/TiO<sub>2</sub>) as efficient heterojunction photocatalysts for the degradation of tetracycline in water. *Adv. Pow. Technol.* **2021**, 32, (8), 2743–2757. <https://doi.org/10.1016/j.appt.2021.05.043>
2. Liu, G.; Wang, G.; Hu, Z.; Su, Y.; Zhao, L., Ag<sub>2</sub>O nanoparticles decorated TiO<sub>2</sub> nanofibers as a p-n heterojunction for enhanced photocatalytic decomposition of RhB under visible light irradiation. *Appl. Surf. Science.* **2019**, 465, 902–910. <https://doi.org/10.1016/j.apsusc.2018.09.216>
